# Supplementary material for: Acidophilic S-doped carbon quantum dots derived from cellulose fibers and their fluorescence sensing performance for metal ions in an extremely strong acid environment
Source: Royal Society of Chemistry journal article supplement (doi:10.1039/c6ta05943k), 2016-01-01
Supplement: c6ta05943k1.pdf [file c6ta05943k1.pdf]

## Supplementary information

### **Acidophilic S-doped carbon quantum dots derived from cellulose fibers and their fluorescence sensing performance for metal ions in an extremely strong acid environment**

GuanghuiYang<sup>ab§</sup>, XuejuanWan<sup>a§\*</sup>, Yikun Su,<sup>a</sup> Xierong Zeng<sup>a</sup> and JiaoningTang<sup>a\*</sup>

<sup>a</sup>Shenzhen Key Laboratory of Polymer Science and Technology, College of Materials Science and Engineering, Shenzhen University, Shenzhen 518060, PR China

<sup>b</sup>Key Laboratory of Optoelectronic Devices and Systems of Ministry of Education and Guangdong Province, College of Optoelectronic Engineering, Shenzhen University, Shenzhen 518060, PR China

§These authors contributed equally to this work

\* Corresponding author: [wanxj@szu.edu.cn](mailto:wanxj@szu.edu.cn); [tjn@szu.edu.cn](mailto:tjn@szu.edu.cn)

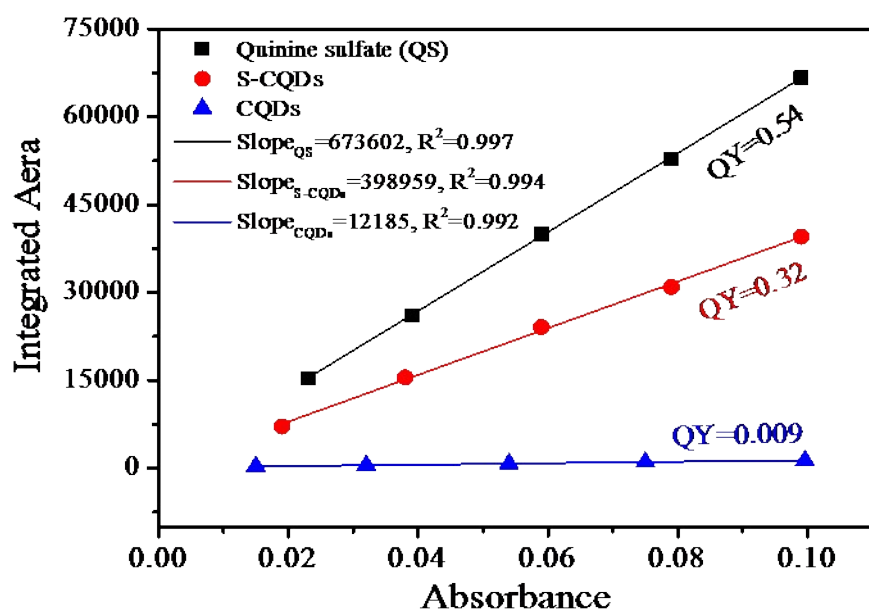

**Fig. S1** Determination of fluorescence quantum yield (QY) for S-CQDs and undoped CQDs.

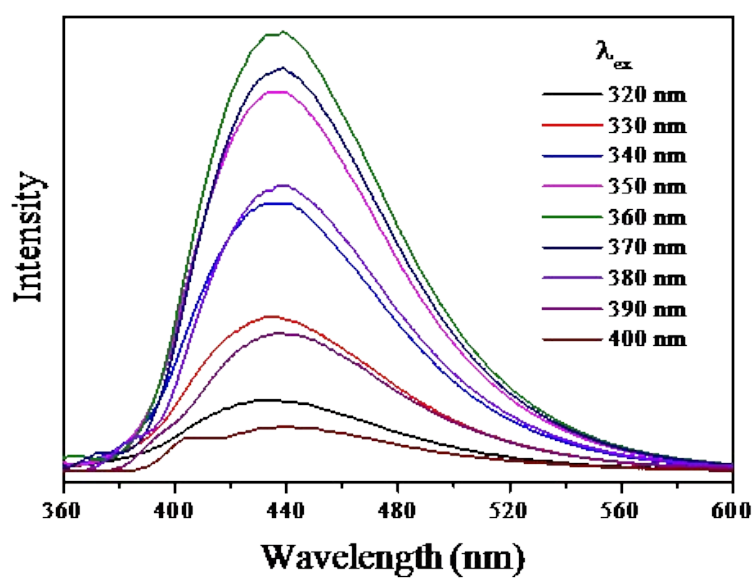

**Fig. S2** Excitation-wavelength dependent PL spectrum of S-CQDs dispersed in a pH 0 aqueous solution.

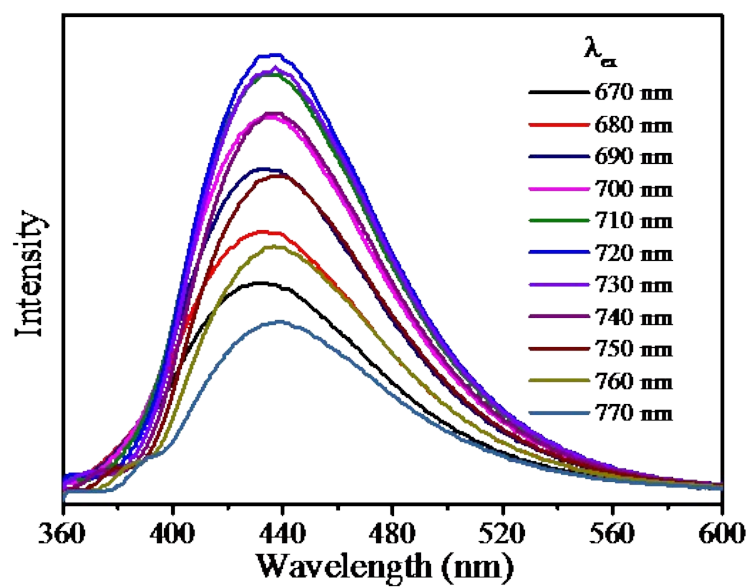

**Fig. S3** Up-conversion PL emission spectra of S-CQDs dispersed in pH 0 aqueous solution.

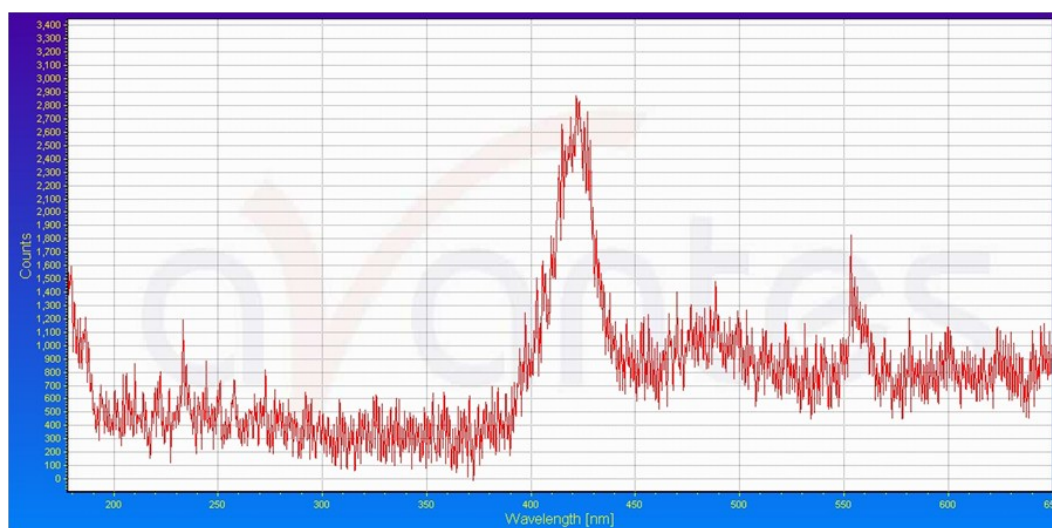

**Fig. S4** Up-conversion PL spectrum obtained from S-CQDs under excitation of a femtosecond pulsed laser at 800 nm (the laser power is 1.4 W).

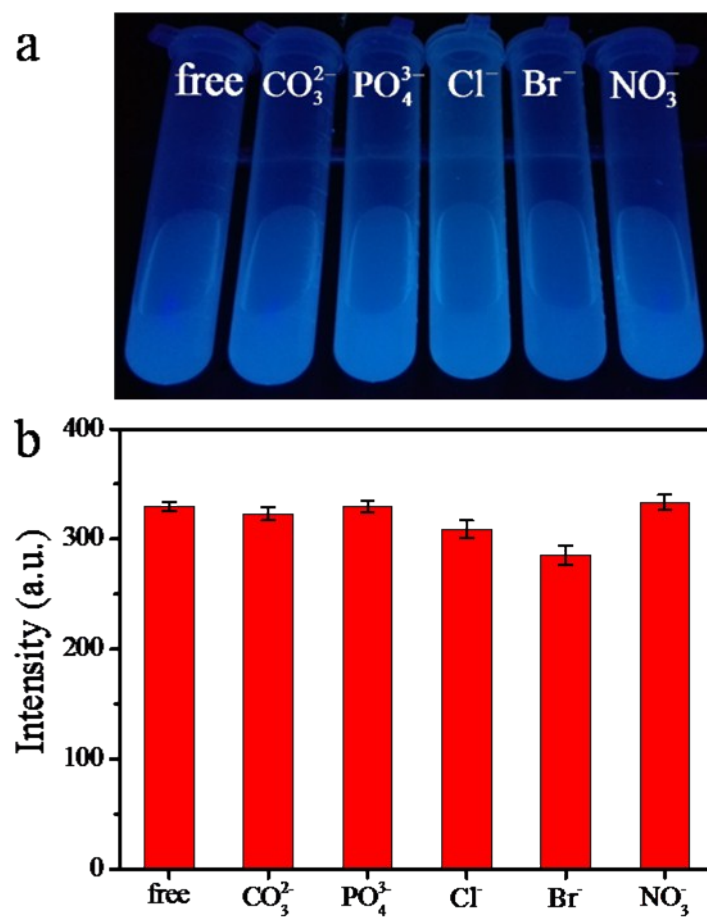

**Fig. S5** (a) Digital photographs and (b) the corresponding PL intensities of S-CQDs dispersed in pH 0 aqueous solutions with 2 mM of various acid ions.
